# Supplementary material for: Transthyretin Maintains Muscle Homeostasis through the Novel Shuttle Pathway of Thyroid Hormones during Myoblast Differentiation
Source: PubMed Central journal article supplement (PMC6952784; doi:10.3390/cells8121565), 2019-12-04
Supplement: cells-08-01565-s001.pdf [file cells-08-01565-s001.pdf]

## **Transthyretin Maintains Muscle Homeostasis through Novel Shuttle Pathway of Thyroid Hormone during Myoblast Differentiation**

Eun Ju Lee<sup>1#</sup>, Sibghatulla Shaikh<sup>1#</sup>, Dukhwan Choi<sup>1</sup>, Khurshid Ahmad<sup>1</sup>, Mohammad Hassan Baig<sup>1</sup>, Jeong Ho Lim<sup>1</sup>, Yong-Ho Lee<sup>2</sup>, Sang Joon Park<sup>3</sup>, Yong-Woon Kim<sup>4</sup>, So-Young Park<sup>4</sup> & Inho Choi<sup>1\*</sup>

<sup>1</sup>Department of Medical Biotechnology, Yeungnam University, Gyeongsan 38541, Korea

<sup>2</sup>Department of Biomedical Science, Daegu Catholic University, Gyeongsan, 38430, Korea

<sup>3</sup>College of Veterinary Medicine, Kyungpook National University, Daegu, 41566, Korea

<sup>4</sup>Department of Physiology, College of Medicine, Yeungnam University, Daegu 42415, Korea

<sup>#</sup>These two authors contributed equally to this work

### **\*Corresponding Author:**

Prof. Inho Choi

Department of Medical Biotechnology

Yeungnam University

Gyeongsan, 38541, Republic of Korea

Fax: +82 53 810 4769

E-mail: inhochoi@ynu.ac.kr

**Table S1. shRNA information**

| shRNA        | Sequence                                                               |                       |                                                            |
|--------------|------------------------------------------------------------------------|-----------------------|------------------------------------------------------------|
| TTR          | TTR shRNA Plasmid (m) is a pool of 3 different shRNA plasmids          |                       |                                                            |
|              | SC-39716-SHA                                                           | Hairpin sequence      | GATCCCTGTAGACGTGGCTGTAAATTCAAGAGATTTACAGCCACGTCTACAGTTTTT  |
|              |                                                                        | Sense                 | CUGUAGACGUGGCUGUAAAAtt                                     |
|              |                                                                        | Antisense             | UUUACAGCCACGUCUACAGtt                                      |
|              | SC-39716-SHB                                                           | Hairpin sequence      | GATCCGAAGATGCCGTGAAGCATTTTTCAAGAGAAATGCTTCACGGCATCTTCTTTTT |
|              |                                                                        | Sense                 | GAAGAUGCCGUGAAGCAUUt                                       |
|              |                                                                        | Antisense             | AAUGCUUCACGGCAUCUUCtt                                      |
|              | SC-39716-SHC                                                           | Hairpin sequence      | GATCCCACCTGCTATTTTCATTCAATTCAAGAGATTGAATGAAATGCAGGTGTTTTT  |
|              |                                                                        | Sense                 | CACCUGCUAUUUCAUUCAAtt                                      |
| Antisense    |                                                                        | UUGAAUGAAAUAGCAGGUGtt |                                                            |
| RXR $\gamma$ | RXR $\gamma$ shRNA Plasmid (m) is a pool of 3 different shRNA plasmids |                       |                                                            |
|              | sc-60868-SHA                                                           | Hairpin sequence      | GATCCCCATCAGGAAAGATCTCATTTCAAGAGAATGAGATCTTTCCTGATGGTTTTT  |
|              |                                                                        | Sense                 | CCAUCAGGAAAGAUCUCAUtt                                      |
|              |                                                                        | Antisense             | AUGAGAUCUUUCCUGAUGGtt                                      |
|              | sc-60868-SHB                                                           | Hairpin sequence      | GATCCGAACGTGGAGAACTCAACATTCAAGAGATGTTGAGTTCTCCACGTTCTTTTT  |
|              |                                                                        | Sense                 | GAACGUGGAGAACUCAACAtt                                      |
|              |                                                                        | Antisense             | UGUUGAGUUCUCCACGUUCtt                                      |
|              | sc-60868-SHC                                                           | Hairpin sequence      | GATCCCTTCGACAGAGTCCTTACATTCAAGAGATGTAAGGACTCTGTGCAAGTTTTT  |
|              |                                                                        | Sense                 | CUUCGACAGAGUCCUUACAtt                                      |
| Antisense    |                                                                        | UGUAAGGACUCUGUCGAAGtt |                                                            |
| TR $\alpha$  | TR $\alpha$ shRNA Plasmid (m) is a pool of 3 different shRNA plasmids  |                       |                                                            |
|              | sc-43689-SHA                                                           | Hairpin sequence      | GATCCCTACCGCTGTATCACTTGTTTCAAGAGAACAAGTGATACAGCGGTAGTTTTT  |
|              |                                                                        | Sense                 | CUACCGCUGUAUCACUUGUtt                                      |
|              |                                                                        | Antisense             | ACAAGUGAUACAGCGGUAGtt                                      |
|              | sc-43689-SHB                                                           | Hairpin sequence      | GATCCCCTGATACATGTTGCTACATTCAAGAGATGTAGCAACATGTATCAGGTTTTT  |
|              |                                                                        | Sense                 | CCUGAUACAUGUUGCUACAtt                                      |
|              |                                                                        | Antisense             | UGUAGCAACAUGUAUCAGGtt                                      |
|              | sc-43689-SHC                                                           | Hairpin sequence      | GATCCGCAAGGGGAGAATATAGATTTCAAGAGAATCTATATTCTCCCCTTGCTTTTT  |
|              |                                                                        | Sense                 | GCAAGGGGAGAAUUAUAGAUtt                                     |
| Antisense    |                                                                        | AUCUAUAUUCUCCCUUGCtt  |                                                            |
| FNDC5        | FNDC5 shRNA Plasmid (m) is a pool of 3 different shRNA plasmids        |                       |                                                            |
|              | sc-143012-SHA                                                          | Hairpin sequence      | GATCCCCTATCATCGGGCTTATTATTCAAGAGATAATAAGCCCCGATGATAGGTTTTT |
|              |                                                                        | Sense                 | CCUAUCAUCGGCUUAUUAAtt                                      |
| Antisense    |                                                                        | UAAUAAGCCCGAUGAUAGGtt |                                                            |

|               |                  |                                                            |
|---------------|------------------|------------------------------------------------------------|
| sc-143012-SHB | Hairpin sequence | GATCCGTCAGCTTGGATAACTGAATTCAAGAGATTCAAGTTATCCAAGCTGACTTTTT |
|               | Sense            | GUCAGCUUGGAUACUGAAtt                                       |
|               | Antisense        | UUCAGUUAUCCAAGCUGACtt                                      |
| sc-143012-SHC | Hairpin sequence | GATCCCCTTCATTCGGGTCTCTAATTCAAGAGATTAGAGACCCGAATGAAGGTTTTT  |
|               | Sense            | CCUUCAUUCGGGUCUCUAAtt                                      |
|               | Antisense        | UUAGAGACCCGAAUGAAGGtt                                      |

**Table S2. Primer information**

| Species | Gene         | Product size (bp) | T <sub>m</sub> (°C) | Sequence (F)                   | Sequence (R)                   |
|---------|--------------|-------------------|---------------------|--------------------------------|--------------------------------|
| Mouse   | GAPDH        | 155               | 59                  | 5'-tgctggctgctgagtatgtcg-3'    | 5'-caagcagttgggtgtacagg-3'     |
| Mouse   | TTR          | 165               | 59                  | 5'-tggacaccaaatcgtactgg-3'     | 5'-aattctgggggtgtctgac-3'      |
| Mouse   | MYOG         | 185               | 59                  | 5'-tccagtacattgagcgcta-3'      | 5'-caaatgatctcctgggtgg-3'      |
| Mouse   | MYOD         | 213               | 59                  | 5'-aggagcacgcacacttctct-3'     | 5'-tctcgaaggcctcattcact-3'     |
| Mouse   | MYL2         | 177               | 59                  | 5'-aaagaggctccaggtccaat-3'     | 5'-cctctctgcttgtgtgtca-3'      |
| Mouse   | RXR $\gamma$ | 190               | 59                  | 5'-cctacgggtgacatgaactg-3'     | 5'-gagaaggaggcaatgagcag-3'     |
| Mouse   | TR $\alpha$  | 259               | 59                  | 5'-tgacattggccagtcaccta-3'     | 5'-ctcagggtcagggtgtcact-3'     |
| Mouse   | D2           | 152               | 59                  | 5'-gatgctcccaattccagtgt-3'     | 5'-caggtggtgaaccaaagt-3'       |
| Mouse   | Hey1         | 164               | 56                  | 5'-agaccgatcaacagtagcc-3'      | 5'-ctcgggatcaaaagaacc-3'       |
| Mouse   | Nmrk2        | 146               | 57                  | 5'-acagccaacgctactctctg-3'     | 5'-ctgctccatctcccgtctat-3'     |
| Mouse   | Fgf21        | 165               | 55                  | 5'-agatcaggggaggtggaaca-3'     | 5'-caaagtggagggtccatag-3'      |
| Mouse   | Ankrd2       | 143               | 58                  | 5'-accaacgtgagagacaagctac-3'   | 5'-gcatcatgtaggcactgtc-3'      |
| Mouse   | Fndc5        | 175               | 59                  | 5'-agtgagcctgtgctcttaa-3'      | 5'-ggcggcagaagagagctataa-3'    |
| Mouse   | R3hdml       | 142               | 57                  | 5'-ggtctgcaactacgccatt-3'      | 5'-gagcctgttgattgagc-3'        |
| Mouse   | Rbm24        | 153               | 57                  | 5'-ctttggcgttcaacagcttc-3'     | 5'-tcaatgtacgggtgtggga-3'      |
| Mouse   | Sox8         | 168               | 57                  | 5'-atgtcacacgtggaggattc-3'     | 5'-ggcaccagactccagtcata-3'     |
| Mouse   | Dok7         | 132               | 57                  | 5'-caatctgtggcgactcaag-3'      | 5'-catacgtgggcatctcactg-3'     |
| Mouse   | Asph         | 183               | 58                  | 5'-tggtgggttagccaagagga-3'     | 5'-gatgcttctgggatgtgtct-3'     |
| Mouse   | Inpp4b       | 175               | 56                  | 5'-gatgtcgggtgacactggaac-3'    | 5'-gtgtcgaagaagttggctgt-3'     |
| Mouse   | Asb2a        | 170               | 56                  | 5'-ggagccaagaatgtctacag-3'     | 5'-ctaccagctctcatgctca-3'      |
| Mouse   | Asb2b        | 167               | 56                  | 5'-ccatcggacatgaggaataca-3'    | 5'-ggtccatgggtgaaatgt-3'       |
| Mouse   | Btbd17       | 153               | 57                  | 5'-gcaaccagagtgaggttatgc-3'    | 5'-aggatgctactcggctacttg-3'    |
| Mouse   | Sema6b       | 163               | 56                  | 5'-cacagtaaagcacgactcaa-3'     | 5'-cacgtcattctgacacac-3'       |
| Mouse   | Actc1        | 163               | 56                  | 5'-tctggcgatggtgtaactca-3'     | 5'-caattcacgttcagcagtg-3'      |
| Mouse   | Ddc          | 110               | 56                  | 5'-tgcaggcttacctcgaag-3'       | 5'-gcagaccaaccaagaatga-3'      |
| Mouse   | Myh1         | 122               | 53                  | 5'-ctctctggaacaagaaaagaaatc-3' | 5'-caagctgctgtttatcgtttctac-3' |
| Mouse   | Myh3         | 130               | 57                  | 5'-gttaagccagaggacgtgtatg-3'   | 5'-tcaccagacgtgtatcgg-3'       |
| Mouse   | Myh8         | 219               | 56                  | 5'-agtaatgcagaggccatcg-3'      | 5'-cttgccttgacaactgagag-3'     |

**Table S3. Molecular weight of protein**

| Protein        | Molecular weight (kDa) |
|----------------|------------------------|
| $\beta$ -actin | 43-44                  |
| TTR            | 17                     |
| MYOD           | 45                     |
| MYOG           | 34                     |
| MYL2           | 19                     |
| D2             | 31                     |
| RXR $\gamma$   | 50-54                  |
| TR $\alpha$    | 48                     |
| FNDC5          | 22                     |

**Table S4.**

**Supplementary Table 1** Functional analysis of up- or down-regulated genes affected by TTR<sub>kd</sub>. Function or role in myogenesis of each **(A)** downregulated and **(B)** upregulated genes. Listed functions were derived from literature review, gene database searches, etc. Rate indicates the fold change average of four independent sample sets of microarray analysis of TTR<sub>wt</sub> or TTR<sub>kd</sub>.

A. TTR<sub>kd</sub> microarray down-regulated gene information related to muscle

| Gene            | Full name                                            | Rate | Function & Highlight                                                                                                                                                                                                  | Etc.                                                                                                                             |
|-----------------|------------------------------------------------------|------|-----------------------------------------------------------------------------------------------------------------------------------------------------------------------------------------------------------------------|----------------------------------------------------------------------------------------------------------------------------------|
| Hey1<br>(Hesr3) | Hairy/enhancer-of-split related with YRPW motif-like | 0.17 | <ul style="list-style-type: none"> <li>• Satellite cell fate decision</li> <li>• Downstream target : Nrf2</li> </ul>                                                                                                  | <ul style="list-style-type: none"> <li>• Size : 35kDa</li> <li>• bHLH Transcription factor (binds to E box : CACGTG )</li> </ul> |
| Nmrk2<br>(MIBP) | Nicotinamide riboside kinase 2                       | 0.2  | <ul style="list-style-type: none"> <li>• Reduces laminin matrix deposition and cell adhesion</li> <li>• Interaction : Integrin <math>\alpha</math>7<math>\beta</math>1 (skeletal muscle specific integrin)</li> </ul> | <ul style="list-style-type: none"> <li>• Size : 22kDa</li> <li>• Kinase of nicotinamide riboside</li> </ul>                      |

|                 |                                                  |      |                                                                                                                                                                                                                                                                            |                                                                                                                                                                      |
|-----------------|--------------------------------------------------|------|----------------------------------------------------------------------------------------------------------------------------------------------------------------------------------------------------------------------------------------------------------------------------|----------------------------------------------------------------------------------------------------------------------------------------------------------------------|
| Fgf21           | Fibroblast growth factor 21                      | 0.22 | <ul style="list-style-type: none"> <li>• Promotes myoblast differentiation</li> <li>• Switch anaerobic myofibers to aerobic myofibers</li> <li>• Controls glucose uptake</li> <li>• Upstream positive controller : MYOD, thyroid hormone, insulin-Akt signaling</li> </ul> | <ul style="list-style-type: none"> <li>• Size : 22kDa</li> <li>• Endocrine FGF (FGF 15/19, FGF21, FGF 23)</li> </ul>                                                 |
| Ankrd2 (AARP)   | Ankyrin repeat domain 2                          | 0.22 | <ul style="list-style-type: none"> <li>• Promotes myoblast differentiation</li> <li>• Controls apoptosis and proliferation</li> <li>• Upstream positive controller : MYOD, Nkx2.5, p53</li> <li>• Interaction : Titin (I-band)</li> </ul>                                  | <ul style="list-style-type: none"> <li>• Size : 40kDa / 36kDa</li> <li>• Muscle Ankyrin repeat</li> <li>• Protein (Ankrd1, Ankrd2, Ankrd23)</li> </ul>               |
| Fndc5 (PeP)     | Fibronectin type III domain-containing protein 5 | 0.25 | <ul style="list-style-type: none"> <li>• Myokine (Irisin)</li> <li>• Controls mitochondria function</li> <li>• Upstream positive controller : Smad3</li> <li>• Downstream target : IGF-1, MSTN, PPAR<math>\gamma</math></li> </ul>                                         | <ul style="list-style-type: none"> <li>• Post translation modification :</li> <li>• 212 aa <math>\rightarrow</math> 112 aa</li> <li>• Circulating hormone</li> </ul> |
| R3hdml          | R3H Domain Containing Like                       | 0.25 | <ul style="list-style-type: none"> <li>• Muscle regeneration</li> </ul>                                                                                                                                                                                                    | <ul style="list-style-type: none"> <li>• Size : 28kDa</li> <li>• Putative Sserine protease inhibitor</li> </ul>                                                      |
| Rbm24           | RNA Binding Motif Protein 24                     | 0.25 | <ul style="list-style-type: none"> <li>• Controls muscle specific splicing events</li> <li>• Critical controller of sarcomerogenesis</li> <li>• Upstream positive controller : MYOD</li> <li>• Downstream target : MYOG, MYOD</li> </ul>                                   | <ul style="list-style-type: none"> <li>• Size : 25kDa</li> <li>• Nuclear protein</li> </ul>                                                                          |
| Sox8            | SRY (sex determining region Y)-box 8             | 0.25 | <ul style="list-style-type: none"> <li>• Satellite cell marker</li> <li>• Negative regulator of skeletal muscle differentiation</li> <li>• Downstream target : basic helix-loop-helix transcription factors</li> </ul>                                                     | <ul style="list-style-type: none"> <li>• Size : 47kDa</li> <li>• Transcription factor (binds on [AT] CAA [AT])</li> </ul>                                            |
| Dok7            | Docking protein 7                                | 0.27 | <ul style="list-style-type: none"> <li>• Neuromuscular junction formation.</li> <li>• Acetylcholine receptor (AChR) accumulation</li> </ul>                                                                                                                                | <ul style="list-style-type: none"> <li>• Size : 53kDa / 73kDa / 28kDa</li> <li>• Non-catalytic cytoplasmic adaptor</li> </ul>                                        |
| Asph            | Aspartate-beta-hydroxylase                       | 0.27 | <ul style="list-style-type: none"> <li>• Ca<sup>2+</sup> storage and release of sarcoplasmic reticulum</li> <li>• Skeletal muscle specific : Junctin (Variant 8)</li> </ul>                                                                                                | <ul style="list-style-type: none"> <li>• Size: 34kDa ( of 86kDa )</li> <li>• ER membrane Ca<sup>2+</sup> sensor</li> </ul>                                           |
| Inpp4b          | Inositol polyphosphate 4-phosphatase type II     | 0.27 | <ul style="list-style-type: none"> <li>• PIP signaling pathway</li> <li>• Highly expressed isoform at skeletal muscle</li> </ul>                                                                                                                                           | <ul style="list-style-type: none"> <li>• Size : 105kDa / 15kDa</li> <li>• PIP signaling phosphatase</li> </ul>                                                       |
| Igf2os (Igf2as) | Insulin-like growth factor 2, opposite strand    | 0.28 | <ul style="list-style-type: none"> <li>• Highly expressed at myoblast</li> <li>• May encode protein sequence</li> </ul>                                                                                                                                                    | <ul style="list-style-type: none"> <li>• Long non-coding RNA</li> <li>• Overlaps partially with IGF2 gene</li> </ul>                                                 |
| Asb2            | Ankyrin repeat and SOCS box-containing 2         | 0.32 | <ul style="list-style-type: none"> <li>• Skeletal muscle specific : Asb2b</li> <li>• Controls myogenic differentiation</li> <li>• Upstream negative controller : TGF-<math>\beta</math></li> </ul>                                                                         | <ul style="list-style-type: none"> <li>• Size : 70kDa</li> <li>• Ankyrin repeat sequence and SOCS box domain</li> </ul>                                              |
| Btbd17          | BTB (POZ) domain containing 17                   | 0.33 | <ul style="list-style-type: none"> <li>• No data</li> </ul>                                                                                                                                                                                                                | <ul style="list-style-type: none"> <li>• Size : 52kDa</li> <li>• Secretion protein</li> </ul>                                                                        |

|        |                                                               |      |                                                                                                                                                                       |                                                                                                                 |
|--------|---------------------------------------------------------------|------|-----------------------------------------------------------------------------------------------------------------------------------------------------------------------|-----------------------------------------------------------------------------------------------------------------|
| Sema6b | Sema domain, transmembrane domain, and cytoplasmic domain, 6B | 0.33 | <ul style="list-style-type: none"> <li>• Upstream negative controller : PPAR<math>\alpha</math></li> </ul>                                                            | <ul style="list-style-type: none"> <li>• Size : 95kDa / 74kDa</li> <li>• Transmembrane protein</li> </ul>       |
| Actc1  | Actin, alpha, cardiac muscle 1                                | 0.34 | <ul style="list-style-type: none"> <li>• Cardiogenesis marker</li> <li>• 5% of total skeletal muscle actin</li> <li>• Predominant at fetal skeletal muscle</li> </ul> | <ul style="list-style-type: none"> <li>• Size : 42kDa</li> <li>• Cytoskeletal protein</li> </ul>                |
| Ddc    | Dopa decarboxylase; Nmrk2, nicotinamide riboside kinase 2     | 0.39 | <ul style="list-style-type: none"> <li>• Converts levodopa to dopamine</li> <li>• Not presented in myotube</li> </ul>                                                 | <ul style="list-style-type: none"> <li>• Size : 54kDa / 37kDa / 45kDa</li> <li>• Dopamine convertase</li> </ul> |

#### B. TTR<sub>kd</sub> microarray up-regulated gene information related to muscle

| Gene              | Full name                                            | Rate | Function & Highlight                                                                                                                                                                                                                      | Etc.                                                                                                                                                                                    |
|-------------------|------------------------------------------------------|------|-------------------------------------------------------------------------------------------------------------------------------------------------------------------------------------------------------------------------------------------|-----------------------------------------------------------------------------------------------------------------------------------------------------------------------------------------|
| Gm10536           | Predicted gene 10536 (Gm10536), long non-coding RNA  | 9.71 | <ul style="list-style-type: none"> <li>• Long non-coding RNA (Predicted gene)</li> <li>• No data</li> </ul>                                                                                                                               |                                                                                                                                                                                         |
| Iws1              | IWS1 homolog (S. cerevisiae)                         | 5.26 | <ul style="list-style-type: none"> <li>• Cell survival and proliferation</li> <li>• Interaction : RNA polymerase II</li> </ul>                                                                                                            | <ul style="list-style-type: none"> <li>• Size : 92kDa / 56kDa / 69kDa</li> <li>• RNA Pol II elongation factor</li> </ul>                                                                |
| Dkk2              | Dickkopf homolog 2                                   | 3.87 | <ul style="list-style-type: none"> <li>• High expression level at quiescent satellite cell</li> <li>• Upstream positive controller : MSTN</li> <li>• Upstream negative controller : APC</li> <li>• Interaction : Wnt signaling</li> </ul> | <ul style="list-style-type: none"> <li>• Size : 28kDa</li> <li>• Secretion protein</li> <li>• Agonist &amp; Antagonist :</li> <li>• Wnt/<math>\beta</math>-catenin signaling</li> </ul> |
| Cdc45             | Cell division cycle 45 (Cdc45), transcript variant 1 | 3.43 | <ul style="list-style-type: none"> <li>• Upstream negative controller : MYOG</li> </ul>                                                                                                                                                   | <ul style="list-style-type: none"> <li>• Size : 66kDa / 60kDa / 69kDa</li> <li>• Initiator of DNA replication</li> </ul>                                                                |
| Suv420h1 (=KMT5B) | Suppressor of variegation 4-20 homolog 1             | 3.07 | <ul style="list-style-type: none"> <li>• Support to maintain quiescence satellite cell property</li> <li>• Heterochromatin formation</li> </ul>                                                                                           | <ul style="list-style-type: none"> <li>• Size : 99kDa / 45kDa / 32kDa</li> <li>• Histone H4K20me3 transferase</li> </ul>                                                                |
| Cdc42bpa          | CDC42 binding protein kinase alpha                   | 2.95 | <ul style="list-style-type: none"> <li>• No data</li> </ul>                                                                                                                                                                               |                                                                                                                                                                                         |
| Zfp318            | Zinc finger protein 318                              | 2.83 | <ul style="list-style-type: none"> <li>• Androgen receptor modulation</li> </ul>                                                                                                                                                          |                                                                                                                                                                                         |





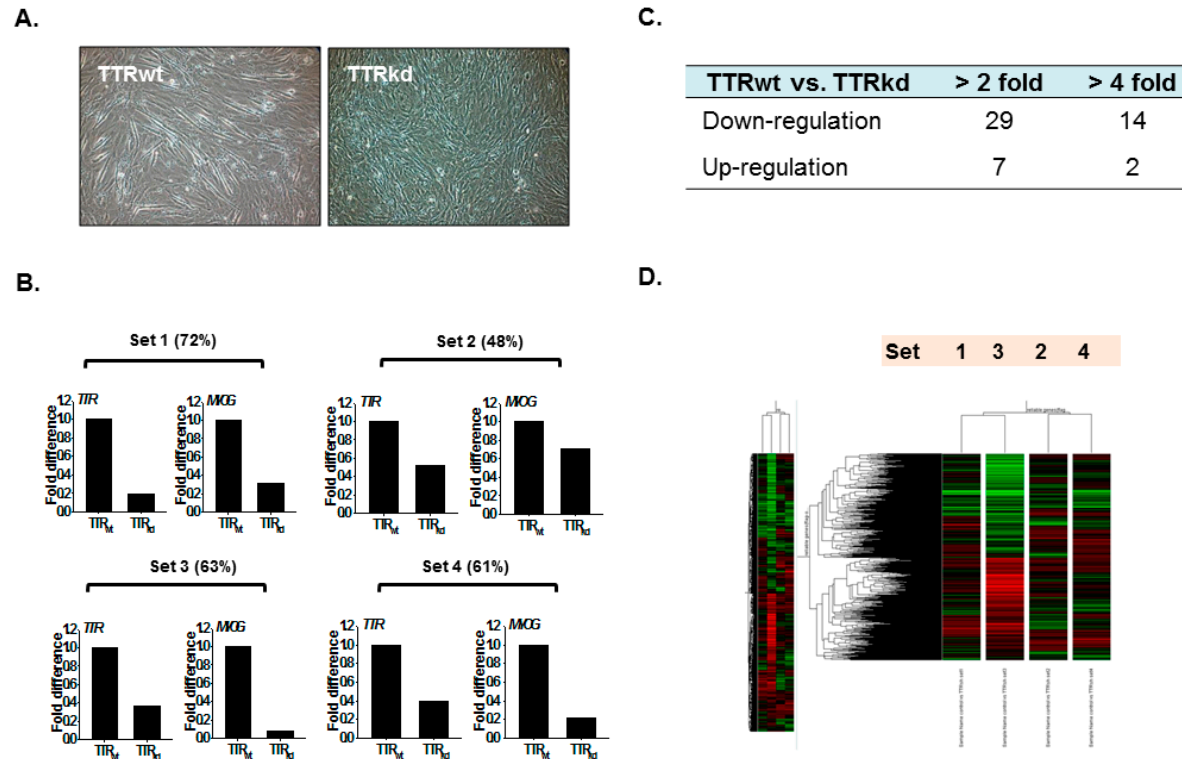

**Supplementary Fig. 1.** Microarray analysis of TTR<sub>kd</sub> cells. TTR<sub>wt</sub> or TTR<sub>kd</sub> were cultured with 2% FBS for 2 days. **A)** Myotube formation in TTR<sub>wt</sub> and TTR<sub>kd</sub>. **B)** TTR and MYOG level by real-time RT-PCR in four sets of TTR<sub>wt</sub> and TTR<sub>kd</sub> cells. **C)** The number of down- and up regulated genes ( $p \leq 0.05$ , 2- or 4-fold  $\leq$ ) **D)** Hierarchical cluster

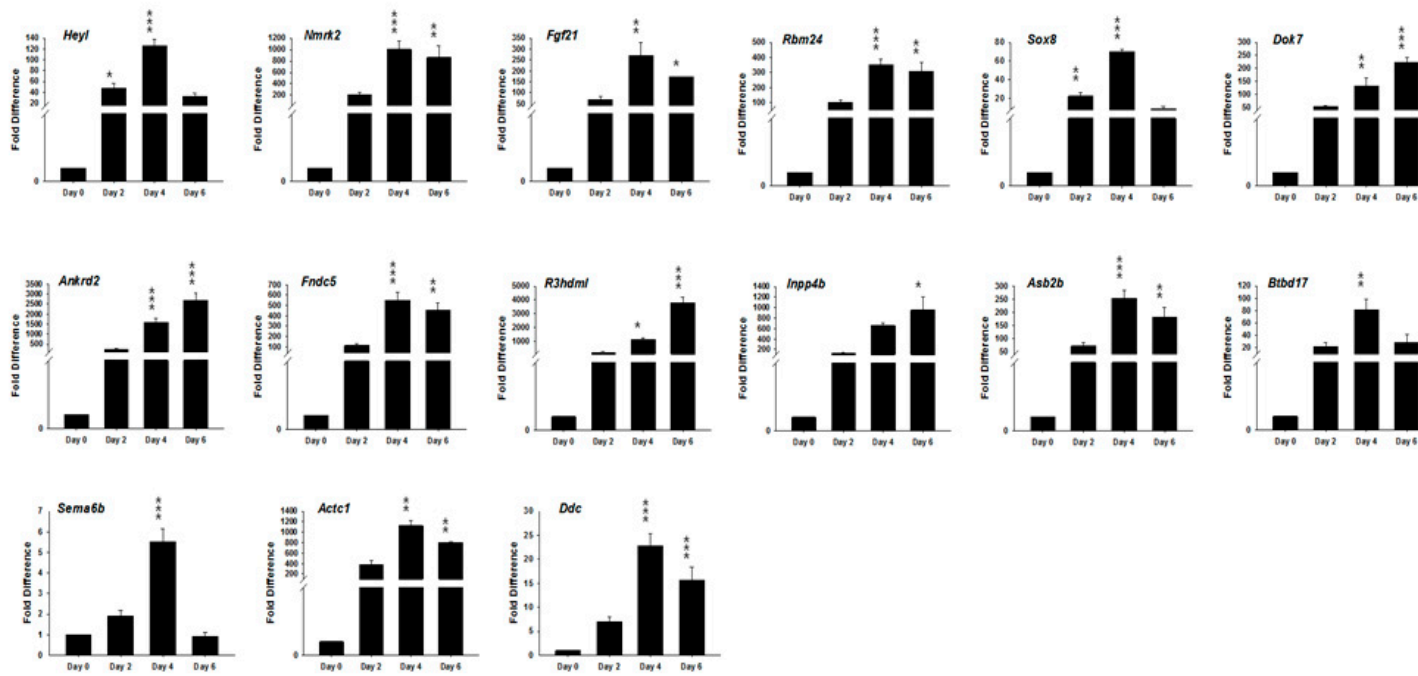

**Supplementary Fig. 2.** Time-course study of down-regulated genes during myoblast differentiation. Expression of down-regulated genes at each time from the start of differentiation (Day 0) to terminal differentiation (Day 6). Within the same interval, mRNA level at four different times were analyzed by real-time RT-PCR. Day 0 was used as the basement expression level in order to compare the various times. Means±SEM. \* $p \leq 0.05$ , \*\* $p \leq 0.001$ , \*\*\* $p \leq 0.001$ .

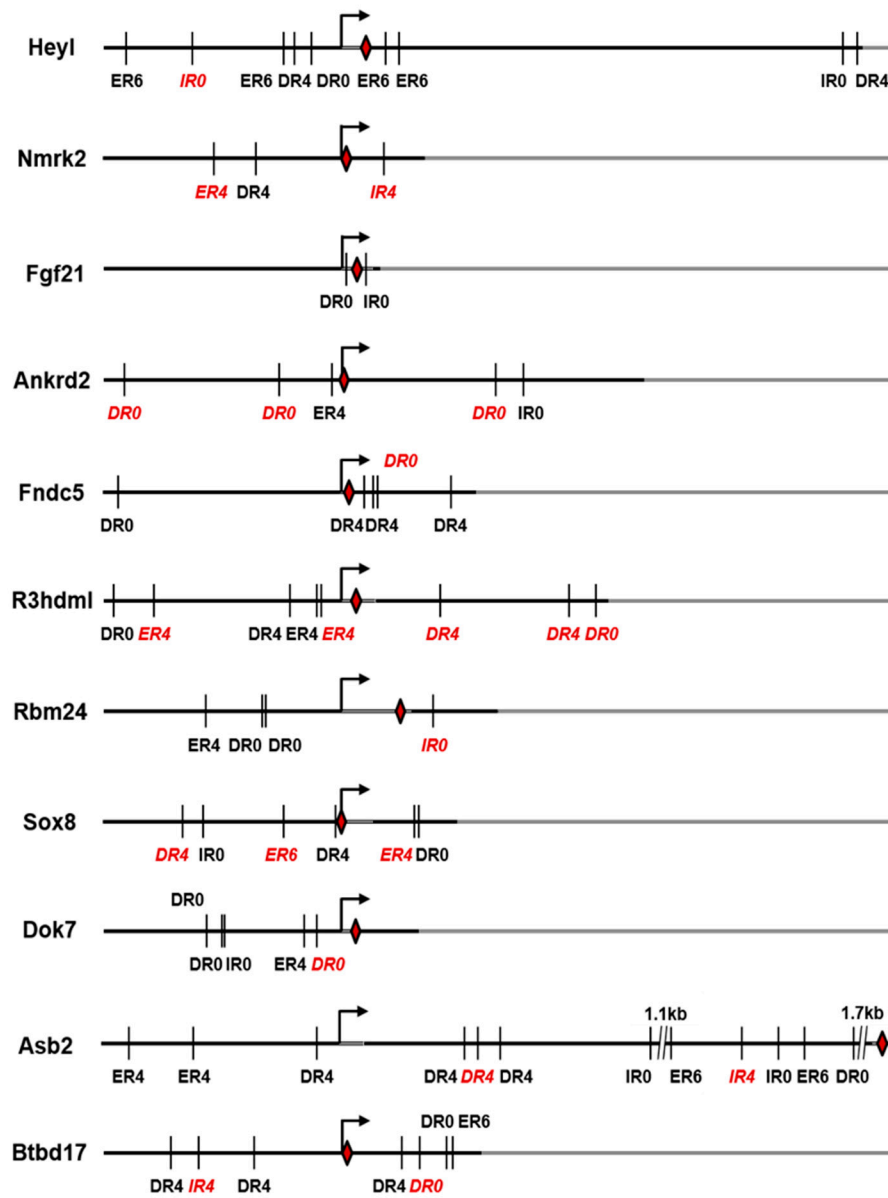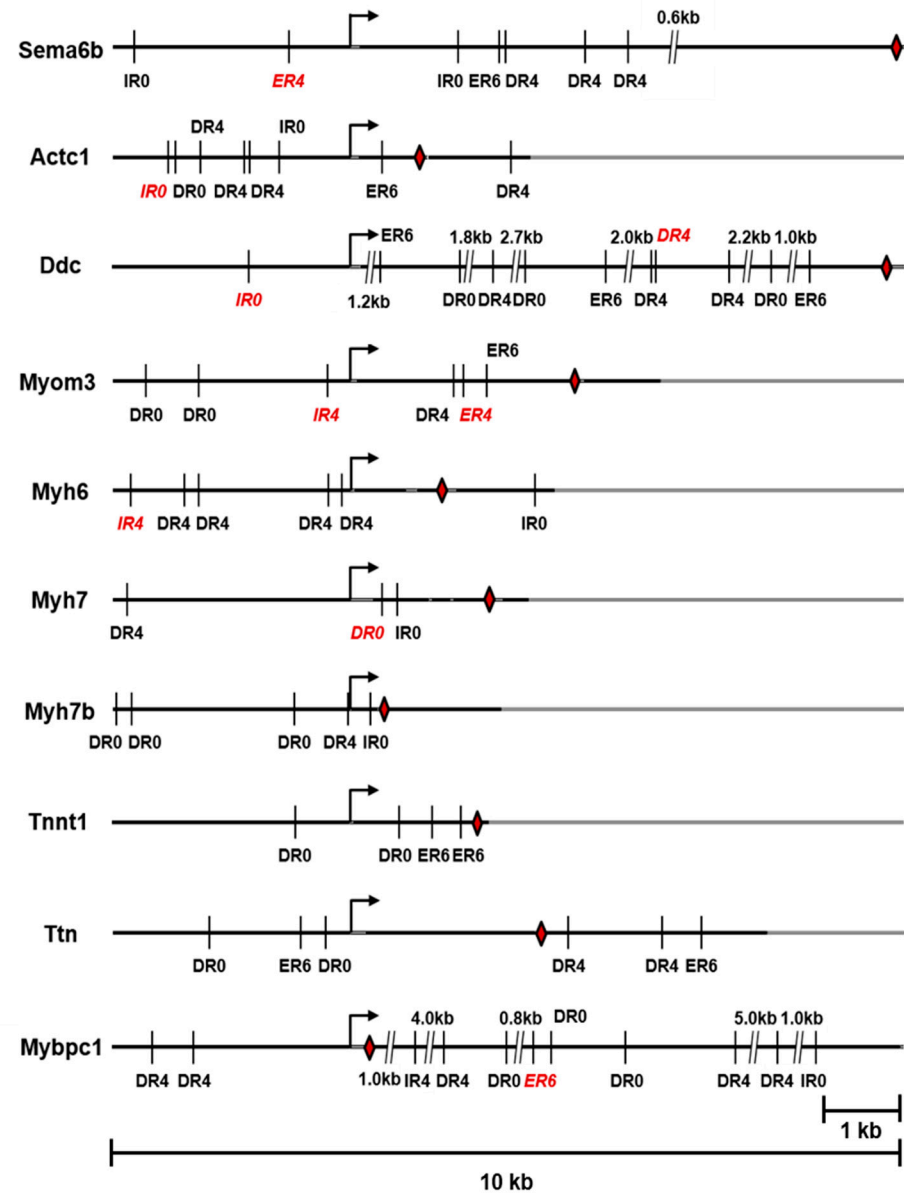

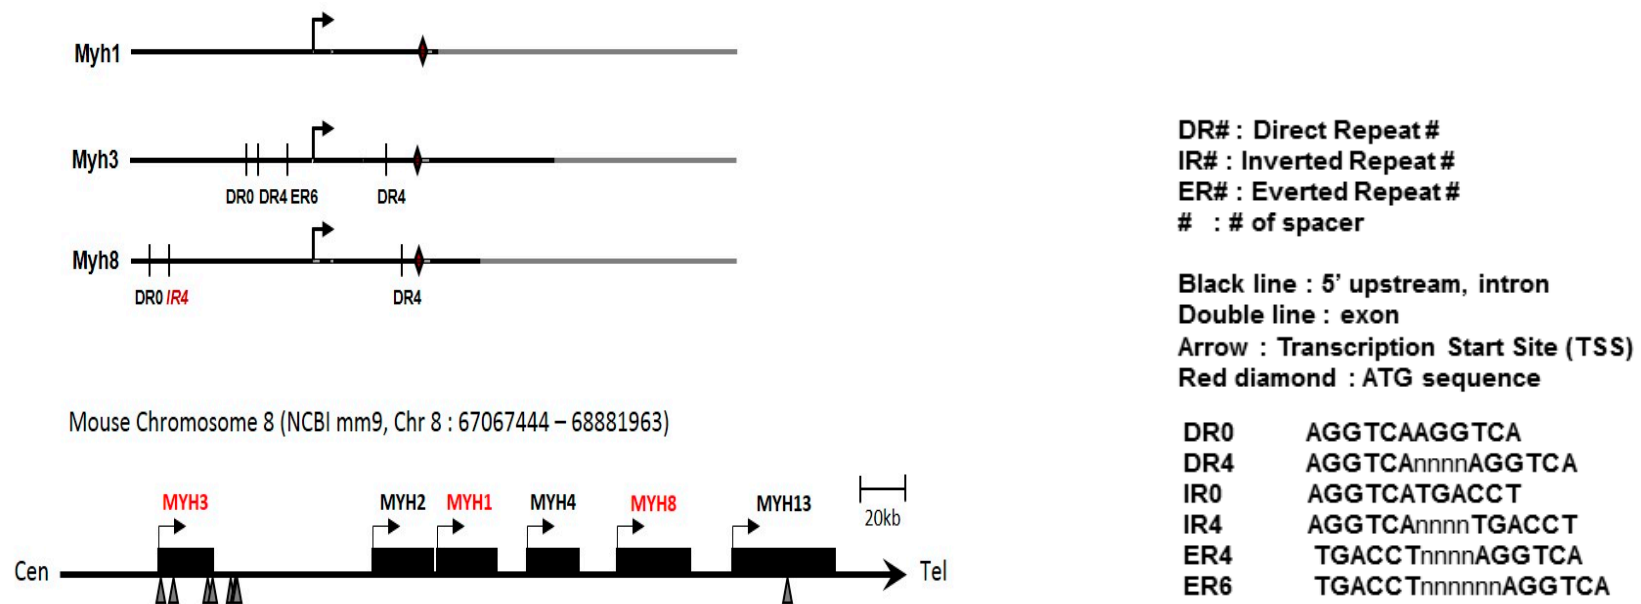

**Supplementary Fig. 3.** Promoter of down-regulated genes was analyzed to predict TRE binding site. Putative TRE site of down-regulated genes (Black line: 5' upstream, intron, double line: exon, arrow: transcription start site, red diamond: ATG sequence).

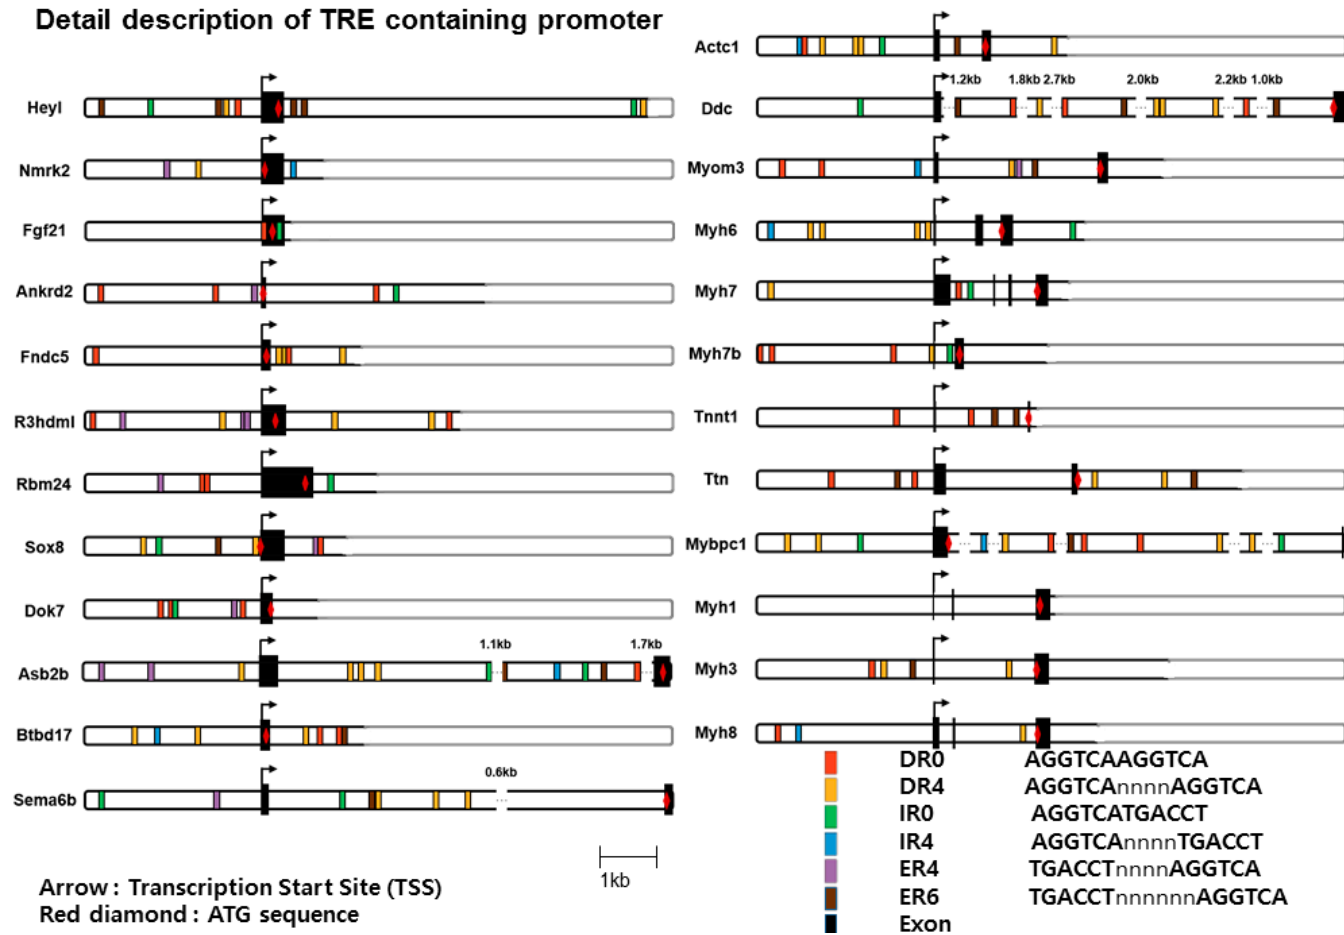

**Supplementary Fig. 4.** Promoter of down-regulated genes was analyzed to predict TRE binding site. Putative TRE site of down-regulated genes (Arrow: transcription start site, red diamond: ATG sequence).
